# Supplementary material for: Dysregulation of ErbB4 Signaling Pathway in the Dorsal Hippocampus after Neonatal Hypoxia-Ischemia and Late Deficits in PV+ Interneurons, Synaptic Plasticity and Working Memory
Source: MDPI journal article supplement (doi:10.3390/ijms24010508), 2022-12-28
Supplement: s1 [file s1]

## SUPPLEMENTAL Table S1

### List of primary antibodies for immunofluorescence immunohistochemistry & western blotting

| Target                            | Catalog #          | Company            | Clonality Isotype | Host    | MW (kDa) on WB | IHC*      | WB  |
|-----------------------------------|--------------------|--------------------|-------------------|---------|----------------|-----------|-----|
| <b>Parvalbumin</b>                | <b>NBP2-50036</b>  | Novus              | Polyclonal IgY    | Chicken | NS             | Yes (IF)  | No  |
|                                   | <b>NB120-11427</b> | Novus              | Polyclonal IgG    | Rabbit  | 12             | Yes (DAB) | No  |
| <b>Nrg-1</b>                      | <b>66492-1-Ig</b>  | ProteinTech        | Monoclonal IgG1   | Mouse   | 67             | Yes (IF)  | No  |
| <b>ErbB4</b>                      | <b>4795S</b>       | Cell Signaling     | Monoclonal IgG    | Rabbit  | 150            | No        | Yes |
|                                   | <b>GTX80811</b>    | GeneTex            | Monoclonal IgG2b  | Mouse   | 150            | Yes (IF)  |     |
| <b>Phospho (Tyr 1162) ErbB4</b>   | <b>PA5-12606</b>   | ThermoFisher       | Polyclonal IgG    | Rabbit  | 150            | No        | Yes |
| <b>Akt</b>                        | <b>2920S</b>       | Cell Signaling     | Monoclonal IgG1   | Mouse   | 60             | No        | Yes |
| <b>Phospho (Ser 473) Akt</b>      | <b>9271S</b>       | Cell Signaling     | Polyclonal IgG    | Rabbit  | 60             | No        | Yes |
| <b>Syt2</b>                       | <b>808402</b>      | DSHB               | Monoclonal IgG2a  | Mouse   | 60             | Yes (IF)  | No  |
| <b>Vglut2</b>                     | <b>ab216463</b>    | Abcam              | Monoclonal IgG    | Rabbit  | 64             | Yes (IF)  | No  |
| <b>GFAP</b>                       | <b>16825-1-AP</b>  | ProteinTech        | Polyclonal IgG    | Rabbit  | 50             | No        | Yes |
|                                   | <b>Z0334</b>       | DAKO North America | Polyclonal IgG    | Rabbit  | NS             | Yes (DAB) | No  |
| <b><math>\alpha</math>-fodrin</b> | <b>FG6090</b>      | Enzo Life Sciences | Monoclonal IgG1   | Mouse   | 250, 150, 120  | No        | Yes |

**ErbB4**, erb-b2 receptor tyrosine kinase 4; **GFAP**, Glial fibrillary acidic protein; **Nrg1**, Neuregulin 1; **Phospho**, phosphorylated form; **WB**, Western Blot; **NS**, Not suitable for western blots; **MW**, Molecular Weight. \*, post WB validation.

**Negative controls for immunofluorescence.** The used subtypes and species-specific immunoglobulin were as follows:

- i. Rabbit IgG isotype (Vector Laboratories, Inc; Burlingame, CA, USA; RRID: AB\_2336355)
- ii. Mouse IgG isotype (Vector Laboratories, Inc; RRID: AB\_2532954)
- iii. Chicken IgY isotype (R&D Systems; RRID: AB\_354263)

**Additional blocking for IHC-IF. Goat F(ab) Anti-Mouse IgG H&L.** (Jackson ImmunoResearch 115-007-003; RRID: AB\_2338476) Goat secondary antibody prepared via immunoaffinity chromatography using Mouse IgG coupled agarose beads against a monospecific antiserum. Additional blocking when performing IF protocols that involved Mouse IgG antibodies was used on mice that exhibited heavy injury.
